# Supplementary material for: Effect of NiFe2O4 on PCDF byproducts formation during thermal degradation of decachlorobiphenyl
Source: Royal Society of Chemistry journal article supplement (doi:10.1039/c4ra02580f), 2014-01-01
Supplement: c4ra02580f1.pdf [file c4ra02580f1.pdf]

## Supplementary Materials

### Effect of NiFe<sub>2</sub>O<sub>4</sub> on PCDF byproducts formation during thermal degradation of decachlorobiphenyl

Linyan Huang, Guijin Su\*, Yexuan Liu, Liewu Li, Sha Liu, Huijie Lu, Minghui Zheng

*State Key Laboratory of Environmental Chemistry and Ecotoxicology, Research Center for Eco-environmental Sciences, Chinese Academy of Sciences, P.O. Box 2871, Beijing 100085, China*

\*Corresponding author: Tel.: +86 10 62849356; Fax: + 86 10 62923563

*E-mail address: [gjsu@rcees.ac.cn](mailto:gjsu@rcees.ac.cn) (G. Su)*

#### List of Supplementary Material Contents:

- **Content 1.** The detailed instrumental information on the analysis of PCDD/Fs.
- **Fig. S1.** SEM image of prepared NiFe<sub>2</sub>O<sub>4</sub>.
- Supplementary explanation for **Fig. S1**.
- **Fig. S2.** The magnetic hysteresis loop of the as-prepared NiFe<sub>2</sub>O<sub>4</sub>.
- Supplementary explanation for **Fig. S2**.
- **Table S1.** Chlorine atom distribution in the degraded products after reaction with 50 mg of NiFe<sub>2</sub>O<sub>4</sub> at 300 °C for 60 min.
- Supplementary explanation for **Table S1**.

**Content 1.** The detailed instrumental information on the analysis of PCDD/Fs.

PCDD/F analysis was performed using an Agilent 6890 high-resolution gas chromatograph (Agilent Technologies Inc., Santa Clara, CA, USA) fitted with a DB-5 MS column (60 m long, 0.25 mm i.d., 0.25  $\mu\text{m}$  film thickness; Agilent Technologies) and a Waters Autospec Ultima high-resolution mass spectrometer (Waters Corp., Milford, MA, USA). The gas chromatograph was operated in splitless mode, and 1  $\mu\text{L}$  of each sample extract was injected using a CTC PAL auto-sampler (CTC Analytics, Zwingen, Switzerland). The temperature program of oven is as follows: 160  $^{\circ}\text{C}$  hold 2 min, then increased to 330  $^{\circ}\text{C}$  with 5  $^{\circ}\text{C min}^{-1}$  and hold 1 min. The mass spectrometer was operated in positive electron impact ionization ( $\text{EI}^+$ ) mode and selective ion monitoring mode, with an electron impact energy of 35 eV and a resolution of 10 000.

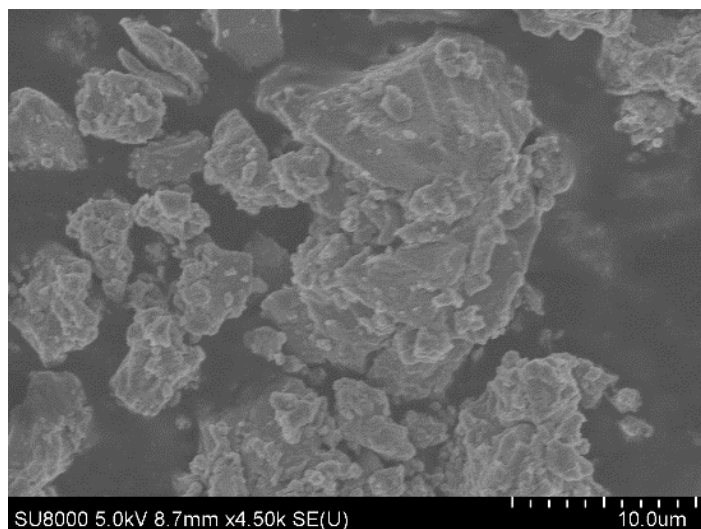

**Fig. S1.** SEM image of the prepared NiFe<sub>2</sub>O<sub>4</sub>.

#### **Supplementary explanation for Fig. S1**

The SEM image of the as-prepared NiFe<sub>2</sub>O<sub>4</sub> is shown in Fig. S1 (measured on Hitachi S-3000N, Hitachi High-Technologies Corporation, Japan). The result exhibited that the NiFe<sub>2</sub>O<sub>4</sub> particles agglomerated into coarser ones with irregular morphology.

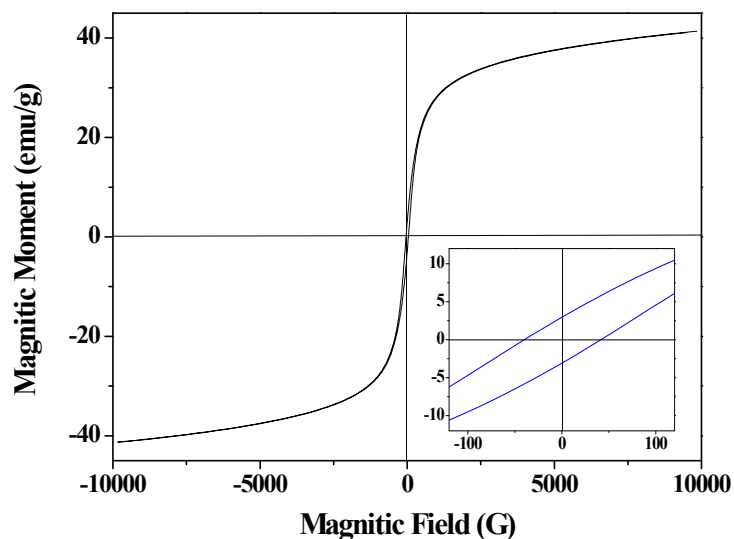

**Fig. S2.** The magnetic hysteresis loop of the as-prepared NiFe<sub>2</sub>O<sub>4</sub>.

### Supplementary explanation for Fig. S2

The magnetic hysteresis loop of the prepared NiFe<sub>2</sub>O<sub>4</sub> was measured by vibrating sample magnetometer of 730T, as shown in Fig. S2. The saturation magnetization (M<sub>s</sub>), remanence (M<sub>r</sub>) and coercivity (H<sub>c</sub>) were 41.3 emu/g, 2.95 emu/g and 39.9 G, respectively. It indicated the as-prepared NiFe<sub>2</sub>O<sub>4</sub> is a magnetic material, which makes its recovery much easier.

**Table S1**

Chlorine atom distribution in the degraded products after reaction with 50 mg of NiFe<sub>2</sub>O<sub>4</sub> at 300 °C for 60 min.

| Products          | PCBs | CBzs | 2378-PCDD/Fs | Cl <sup>-</sup> (inorganic) | Other chlorinated products |
|-------------------|------|------|--------------|-----------------------------|----------------------------|
| Cl percentage (%) | 5.69 | 5.07 | 7.80e-5      | 74.0                        | 15.2                       |

**Supplementary explanation for Table S1**

The mass balance of CB-209 during the thermal degradation was analyzed by calculation of chlorine atom distribution in the degraded products. The inorganic Cl<sup>-</sup> in degradation products was measured by ion chromatograph (ICS-1500). After the thermal reaction, the ampoule was cooled to room temperature and crushed. The fragments were extracted by ultrasonic with 9 mmol L<sup>-1</sup> Na<sub>2</sub>CO<sub>3</sub> aqueous solution three times.

Taken NiFe<sub>2</sub>O<sub>4</sub> reaction system for example, the chlorine atom distribution percentage after degradation of 1 mg CB-209 using 50 mg NiFe<sub>2</sub>O<sub>4</sub> at 300 °C for 60 min is showed in Table S2. The percentages of chlorine atoms in the detected PCBs containing the residual CB-209 and newly formed lower chlorinated biphenyls were 5.69%, while that for the formed chlorobenzenes (CBzs) was 5.07%. The inorganic Cl<sup>-</sup> took the most of chlorine contribution with 74.0%. However, the chlorine percentage in 2,3,7,8-PCDD/Fs was only 7.80×10<sup>-5</sup> % due to the inhibition of PCDF formation by NiFe<sub>2</sub>O<sub>4</sub>. The above sources of chlorine atoms combined account for only 84.8% of the initial chlorine atoms, leaving 15.2% of the chlorine atoms unaccounted for. A similar mass discrepancy was reported for the degradation of 1,2,4-trichlorobenzene over Co<sub>3</sub>O<sub>4</sub> [1] and HCB over CaO/Fe<sub>2</sub>O<sub>3</sub> [2].

References:

- [1] S. Lin, G. Su, M. Zheng, M Jia, Ch. Qi and W Li, *J. Hazard. Mater.*, 2011, **192**, 1697.
- [2] X. Ma, M. Zheng, W. Liu, Y. Qian, B. Zhang and W. Liu, *J. Hazard. Mater.*, 2005, **127**, 1.
